# Supplementary material for: N-terminal cysteine acetylation and oxidation patterns may define protein stability
Source: PubMed Central journal article supplement (PMC11199558; doi:10.1038/s41467-024-49489-2), 2024-06-25
Supplement: 41467_2024_49489_MOESM3_ESM.pdf [file 41467_2024_49489_MOESM3_ESM.pdf]

## **Description of Additional Supplementary Files**

**Supplementary Data 1.** Supplementary Tables 1-5.

**Supplementary Data 2.** Full in vitro substrate screening data.

**Supplementary Data 3.** One-Way ANOVA followed by Tukeys's Multiple Comparison Test of OS Peptide 1 minute Screening Data.

**Supplementary Data 4.** One-Way ANOVA followed by Tukeys's Multiple Comparison Test of AS Peptide 1 minute Screening Data.

**Supplementary Data 5.** Fold changes observed in DFOR assays in Figure 4.
